# Supplementary material for: Characterization of Uropathogenic Escherichia coli Reveals Hybrid Isolates of Uropathogenic and Diarrheagenic (UPEC/DEC) E. coli
Source: MDPI journal article supplement (doi:10.3390/microorganisms10030645), 2022-03-17
Supplement: s1 [file s1]

## SUPPLEMENTARY MATERIALS

**Table S1.** Primers used to detect virulence factor-encoding genes in the uropathogenic *E. coli* (UPEC) isolates studied.

| Virulence factors investigated    | Target gene      | Primers sequence (5' → 3')                               | Amplicon size (bp) | References |
|-----------------------------------|------------------|----------------------------------------------------------|--------------------|------------|
| <b>Adhesins</b>                   |                  |                                                          |                    |            |
| Type 1 fimbriae                   | <i>fimH</i>      | TGCAGAACGGATAAGCCGTGG<br>GCAGTCACCTGCCCTCCGGTA           | 508                | [74]       |
| P fimbriae                        | <i>papA</i>      | ATGGCAGTGGTGTCTTTTGGTG<br>CGTCCCACCATACGTGCTCTTC         | 720                | [74]       |
|                                   | <i>papC</i>      | GACGGCTGTACTGCAGGGTGTGGCG<br>ATATCCTTTCTGCAGGGATGCAATA   | 328                | [75]       |
| Afa/Dr adhesins                   | <i>afaBC</i>     | GCTGGGCAGCAAACCTGATAACTCTC<br>CATCAAGCTGTTTGTTTCGTCCGCCG | 750                | [75]       |
| S/F1C fimbriae                    | <i>sfa/focDE</i> | CGGAGGAGTAATTACAAACCTGGCA<br>CTCCGGAGAACTGGGTGCATCTTAC   | 410                | [75]       |
| <i>E. coli</i> common pilus (ECP) | <i>ecpA</i>      | GCAACAGCCAAAAAAGACACC<br>CCAGGTCGCGTCGAACT               | 477                | [76]       |
| IrgA homologue adhesin            | <i>iha</i>       | CAGGTCGGGGTTACCAAGT<br>CAAATGGCTCTCTTCCGTCAATGC          | 925                | [77]       |
| Heat-resistant agglutinin         | <i>hra</i>       | TCACTTGCAGACCAGCGTTTC<br>GTAACTCACACTGCTGTCACCT          | 537                | [77]       |
| M-agglutinin                      | <i>bmaE</i>      | ATGGCGCTAACTTGCCATGCTG<br>AGGGGGACATATAGCCCCCTTC         | 507                | [74]       |
| <b>Invasin</b>                    |                  |                                                          |                    |            |
| Invasion of brain endothelium     | <i>ibeA</i>      | AGGCAGGTGTGCGCCGCGTAC<br>TGGTGCTCCGGCAAACCATGC           | 170                | [74]       |

Table S1. Continued

| Virulence factors investigated                   | Target gene | Primers sequence (5' → 3')                             | Amplicon size (bp) | References |
|--------------------------------------------------|-------------|--------------------------------------------------------|--------------------|------------|
| <b>Toxins</b>                                    |             |                                                        |                    |            |
| Hemolysin A                                      | <i>hlyA</i> | AACAAGGATAAGCACTGTTCTGGCT<br>ACCATATAAGCGGTCATTCCCGTCA | 1177               | [74]       |
| Cytotoxic necrotizing factor 1                   | <i>cnfI</i> | AAGATGGAGTTTCCTATGCAGGAG<br>CATTGAGAGTCCTGCCCTCATTATT  | 498                | [79]       |
| Cytolethal distending toxin                      | <i>cdt</i>  | GAAARTAAATGGAAYAYAMATGTCCG<br>AATCWCCWRSATCATCCAGTTA   | 466                | [80]       |
| Secreted autotransporter toxin                   | <i>sat</i>  | TGCTGGCTCTGGAGGAAC<br>TTGAACATTGAGAGTACCGGG            | 667                | [78]       |
| vacuolating autotransporter toxin                | <i>vat</i>  | AACGGTTGGTGGCAACAATCC<br>AGCCCTGTAGAATGGCGAGTA         | 420                | [81]       |
| Uropathogenic specific protein                   | <i>usp</i>  | ACATTCACGGCAAGCCTCAG<br>AGCGAGTTCCTGGTGAAAGC           | 448                | [82]       |
| Protein involved in colonization (Pic) from UPEC | <i>picU</i> | TCAGGCCCGTAAGAACAGCAAAAT<br>ACGGTAAGAGTGTGGATGGCGGAGTC | 372                | [83]       |
| Temperature-sensitive hemagglutinin              | <i>tsh</i>  | ACTATTCTCTGCAGGAAGTC<br>CTTCCGATGTTCTGAACGT            | 824                | [84]       |
| Hemolysin F                                      | <i>hlyF</i> | GGCGATTTAGGCATTCCGATACTC<br>ACGGGGTCGCTAGTTAAGGAG      | 599                | [85]       |
| <b>Iron acquisition</b>                          |             |                                                        |                    |            |
| Salmochelins                                     | <i>iroN</i> | AAGTCAAAGCAGGGGTTGCCCCG<br>GACGCCGACATTAAGACGCAG       | 665                | [86]       |
| Yersiniabactin                                   | <i>irp2</i> | AAGGATTCGCTGTTACCGGAC<br>TCGTCCGGGCAGCGTTTCTTCT        | 264                | [87]       |
| Aerobactin                                       | <i>iucD</i> | AAGTGTCGATTTTATTGGTGTA<br>CCATCCGATGTCAGTTTTCTG        | 760                | [88]       |
| Siderophore receptor IreA                        | <i>ireA</i> | ATTGCCGTGATGTGTTCTGC<br>CACGGATCACTTCAATGCGT           | 384                | [78]       |
| Periplasmic iron-binding protein                 | <i>sitA</i> | AGGGGGCACAACCTGATTCTCG<br>TACCGGGCCGTTTTCTGTGC         | 608                | [89]       |

**Table S1. Continued**

| Virulence factors investigated | Target gene     | Primers sequence (5' → 3')                       | Amplicon size (bp) | References |
|--------------------------------|-----------------|--------------------------------------------------|--------------------|------------|
| <b>Protectins</b>              |                 |                                                  |                    |            |
| Surface exclusion protein      | <i>traT</i>     | GGTGTGGTGCGATGAGCACAG<br>CACGGTTCAGCCATCCCTGAG   | 290                | [74]       |
| Outer membrane protease T      | <i>ompT</i>     | ATCTAGCCGAAGAAGGAGGC<br>CCCGGGTCATAGTGTTTCATC    | 559                | [90]       |
| Increased serum survival       | <i>iss</i>      | ATCACATAGGATTCTGCCG<br>CAGCGGAGTATAGATGCCA       | 309                | [91]       |
| Group II capsule               | <i>kpsMTII</i>  | GCGCATTTGCTGATACTGTTG<br>CATCCAGACGATAAGCATGAGCA | 272                | [74]       |
| Colicin V                      | <i>cvi/cvaC</i> | TCCAAGCGGACCCCTTATAG<br>CGCAGCATAGTTCCATGCT      | 597                | [78]       |

**Table S2.** Primers used to detect virulence factor-encoding genes associated with the distinct diarrheagenic *E. coli* (DEC) pathotypes.

| DEC pathotype <sup>a</sup> | Target gene              | Primers sequence (5' → 3')                    | Amplicon size (bp) | References |
|----------------------------|--------------------------|-----------------------------------------------|--------------------|------------|
| EPEC/EHEC                  | <i>escN</i>              | CGACGACTATTGCAGAGT<br>GCCTTATCTGCTTCAGGA      | 499                | [92]       |
| Typical EPEC               | <i>bfpB</i>              | GACACCTCATTGCTGAAGTCG<br>CCAGAACACCTCCGTTATGC | 910                | [93]       |
| STEC                       | <i>stx1/2</i>            | GAGCGAAATAATTTATATGTG<br>TGATGATGGCAATTCAGTAT | 518                | [94]       |
| EAEC                       | <i>aatA</i>              | CTGGCGAAAGACTGTATCAT                          | 630                | [95]       |
|                            | <i>aggR</i> <sup>b</sup> | CAATGTATAGAAATCCGCTGTT                        | 254                | [96]       |
|                            |                          | GTATACACAAAAGAAGGAAGC<br>ACAGAATCGTCAGCATCAGC |                    |            |

<sup>a</sup>Diarrheagenic *E. coli* (DEC) pathotypes investigated: EPEC: enteropathogenic *E. coli*, STEC: shiga toxin-producing *E. coli*, and EAEC: enteroaggregative *E. coli*. EHEC (enterohemorrhagic *E. coli*) is a subgroup of the STEC pathotype that besides the shiga toxin-encoding genes (*stx1* and/or *stx2*), also harbor the LEE (locus of enterocyte effacement) region (*escN*<sup>+</sup>).

<sup>b</sup>The *aggR* gene, encoding a transcriptional regulator, is used to differentiate typical (*aatA*<sup>+</sup>/*aggR*<sup>+</sup>) than atypical (*aatA*<sup>+</sup>/*aggR*<sup>-</sup>) EAEC isolates.

**Table S3.** Primers used to detect  $\beta$ -lactamase-encoding genes in the Extended Spectrum Beta-Lactamases (ESBL)-producing uropathogenic *E. coli* (UPEC) isolates identified in this study.

| Target gene                         | Primers sequence (5' → 3')                            | Amplicon size (bp) | References |
|-------------------------------------|-------------------------------------------------------|--------------------|------------|
| <i>bla<sub>SHV</sub></i>            | ATTTGTCGCTTCTTTACTCGC<br>TTTATGGCGTTACCTTTGACC        | 1051               | [97]       |
| <i>bla<sub>TEM-1</sub></i>          | ATGAGTATTCAACATTTCCTG<br>TTACCAATGCTTAATCAGTGAG       | 840                | [98]       |
| <i>bla<sub>CTX-M-2-group</sub></i>  | AAATGTGCTGCTCCTTTTCGTGAGC<br>AGGGTTCGTTGCAAGACAAGACTG | 1112               | [99]       |
| <i>bla<sub>CTX-M-8-group</sub></i>  | GCAAGCGCATTTTTGTTTTT<br>GACGACTTTCTGCCTTCTGC          | 900                | [100]      |
| <i>bla<sub>CTX-M-15-group</sub></i> | CACACGTGGAATTTAGGGACT<br>GCCGTCTAAGGCGATAAACA         | 499                | [101]      |
| <i>bla<sub>CMY-2</sub></i>          | ATGATGAAAAAATCGTTATGCT<br>TTATTGCAGCTTTTCAAGAATGCG    | 1140               | [102]      |

**Table S4.** Age, gender and clinical diagnosis of the outpatients with urinary tract infections included in this study.

| Age and<br>Clinical diagnosis  | No. of Patients (%)      |                             |                   |
|--------------------------------|--------------------------|-----------------------------|-------------------|
|                                | Patients Gender:         |                             | Total             |
|                                | Male<br>( <i>n</i> = 11) | Female<br>( <i>n</i> = 101) | ( <i>n</i> = 112) |
| <b>Age range</b>               |                          |                             |                   |
| 0-10                           | 3 (27.3)                 | 6 (5.9)                     | 9 (8.0)           |
| 11-17                          | 1 (9.1)                  | 7 (6.9)                     | 8 (7.1)           |
| 18-40                          | 0                        | 33 (32.7)                   | 33 (29.5)         |
| 41-65                          | 2 (18.2)                 | 33 (32.7)                   | 35 (31.3)         |
| > 65                           | 5 (45.4)                 | 22 (21.8)                   | 27 (24.1)         |
| <b>Clinical diagnosis</b>      |                          |                             |                   |
| Cystitis                       | 8 (72.7)                 | 79 (78.2)                   | 87 (77.7)         |
| Pyelonephritis                 | 2 (18.2)                 | 9 (8.9)                     | 11 (9.8)          |
| Asymptomatic bacteriuria (ABU) | 1 (9.1)                  | 10 (9.9)                    | 11 (9.8)          |
| No information available       | 0                        | 3 (3.0)                     | 3 (2.7)           |

**Table S5.** Serotypes and *E. coli* phylogroups of the uropathogenic *E. coli* (UPEC) isolates studied.

| Serogroup <sup>a</sup> | H type <sup>b</sup> | Phylogroup | UPEC Identification <sup>c</sup>  | No. of Isolates (%) |
|------------------------|---------------------|------------|-----------------------------------|---------------------|
| <b>O1</b>              | H7                  | F          | 87                                | 1 (0.9)             |
|                        | H25                 | F          | 12                                | 1 (0.9)             |
|                        | HNM                 | D          | 53                                | 1 (0.9)             |
| <b>O2</b>              | H7                  | B2         | 25, 80                            | 2 (1.8)             |
| <b>O3</b>              | H2                  | A          | 34                                | 1 (0.9)             |
| <b>O4</b>              | H4                  | B2         | 8, 68                             | 2 (1.8)             |
| <b>O6</b>              | H1                  | B2         | 2, 24, 32, 71, 75, 76, 99, 102    | 8 (7.1)             |
|                        | H31                 | B2         | 27, 45, 74, 88, 96                | 5 (4.5)             |
|                        | HNM                 | B2         | 50                                | 1 (0.9)             |
| <b>O8</b>              | H40                 | B1         | 62                                | 1 (0.9)             |
| <b>O15</b>             | H2                  | G          | 6                                 | 1 (0.9)             |
|                        | H6                  | D          | 69                                | 1 (0.9)             |
| <b>O16</b>             | H5                  | B2         | 33                                | 1 (0.9)             |
| <b>O17</b>             | H18                 | D          | 4                                 | 1 (0.9)             |
| <b>O18</b>             | H7                  | B2         | 5                                 | 1 (0.9)             |
|                        | H31                 | B2         | 26, 35                            | 2 (1.8)             |
| <b>O20</b>             | H9                  | C          | 15                                | 1 (0.9)             |
| <b>O21</b>             | H12                 | A          | 7                                 | 1 (0.9)             |
|                        | H21                 | B1         | 49                                | 1 (0.9)             |
|                        | HNM                 | B2         | 29                                | 1 (0.9)             |
| <b>O25</b>             | H4                  | B2         | 18, 21, 28, 89, 90, 101, 114, 117 | 8 (7.1)             |
|                        | H18                 | G          | 108                               | 1 (0.9)             |
|                        | HNM                 | A          | 118                               | 1 (0.9)             |
| <b>O55</b>             | H8                  | G          | 48                                | 1 (0.9)             |
| <b>O75</b>             | HNM                 | B2         | 23                                | 1 (0.9)             |
| <b>O81</b>             | H14                 | B1         | 58                                | 1 (0.9)             |
| <b>O82</b>             | H18                 | D          | 3                                 | 1 (0.9)             |
| <b>O83</b>             | H4                  | B2         | 73                                | 1 (0.9)             |
|                        | H33                 | B2         | 70                                | 1 (0.9)             |
| <b>O84</b>             | H14                 | B1         | 13                                | 1 (0.9)             |
| <b>O86</b>             | H2                  | D          | 22, 41                            | 2 (1.8)             |
| <b>O90</b>             | H2                  | D          | 100                               | 1 (0.9)             |
| <b>O101</b>            | HNM                 | A          | 109                               | 1 (0.9)             |
| <b>O103</b>            | H7                  | B1         | 14                                | 1 (0.9)             |
| <b>O110</b>            | H28                 | B1         | 107                               | 1 (0.9)             |
| <b>O126</b>            | H10                 | B1         | 85                                | 1 (0.9)             |
| <b>O139</b>            | H19                 | B1         | 81                                | 1 (0.9)             |
| <b>O145</b>            | H34                 | B2         | 92                                | 1 (0.9)             |
| <b>O153</b>            | H2                  | D          | 59                                | 1 (0.9)             |
| <b>O160</b>            | H11                 | B1         | 52                                | 1 (0.9)             |
| <b>O164</b>            | HNM                 | F          | 78                                | 1 (0.9)             |
| <b>O172</b>            | H5                  | B2         | 31                                | 1 (0.9)             |

Table S5. *Continued*

| Serogroup <sup>a</sup> | H type <sup>b</sup> | Phylogroup       | UPEC Identification <sup>c</sup> | No. of Isolates (%) |
|------------------------|---------------------|------------------|----------------------------------|---------------------|
| ONT                    | H1                  | B2               | 47                               | 1 (0.9)             |
|                        | H4                  | A                | 112                              | 1 (0.9)             |
|                        |                     | B2               | 9, 116                           | 2 (1.8)             |
|                        |                     | G                | 40                               | 1 (0.9)             |
|                        | H5                  | A                | 44                               | 1 (0.9)             |
|                        | H7                  | A                | 61                               | 1 (0.9)             |
|                        |                     | B1               | 54                               | 1 (0.9)             |
|                        |                     | B2               | 82, 97                           | 2 (1.8)             |
|                        | H8                  | E                | 110                              | 1 (0.9)             |
|                        | H9                  | C                | 72                               | 1 (0.9)             |
|                        | H14                 | D                | 115                              | 1 (0.9)             |
|                        | H18                 | B1               | 57                               | 1 (0.9)             |
|                        |                     | D                | 38, 113, 119                     | 3 (2.7)             |
|                        | H25                 | B1               | 37                               | 1 (0.9)             |
|                        | H30                 | E                | 91                               | 1 (0.9)             |
|                        | HNM                 | A                | 17, 19, 20, 30, 36, 65, 79, 93   | 8 (7.1)             |
|                        |                     | B1               | 16                               | 1 (0.9)             |
|                        |                     | B2               | 42                               | 1 (0.9)             |
|                        |                     | F                | 63                               | 1 (0.9)             |
|                        |                     | <i>E. clades</i> | 10, 60                           | 2 (1.8)             |
| OR                     | H4                  | B1               | 94                               | 1 (0.9)             |
|                        |                     | B2               | 39, 56                           | 2 (1.8)             |
|                        |                     | D                | 111                              | 1 (0.9)             |
|                        | H6                  | F                | 120                              | 1 (0.9)             |
|                        | H10                 | B1               | 51                               | 1 (0.9)             |
|                        | H18                 | B2               | 46, 106                          | 2 (1.8)             |
|                        | H33                 | A                | 95                               | 1 (0.9)             |
|                        | H34                 | F                | 43                               | 1 (0.9)             |
|                        | H45                 | D                | 64                               | 1 (0.9)             |
|                        | H51                 | B1               | 55                               | 1 (0.9)             |
|                        | HNM                 | A                | 11, 98                           | 2 (1.8)             |
|                        |                     | F                | 1, 103                           | 2 (1.8)             |

<sup>a</sup>ONT: O-non-typeable and OR: rough (autoagglutinable) isolates

<sup>b</sup>HNM: non-motile UPEC isolates.

<sup>c</sup>Eight UPEC isolates (UPEC identification: 66, 67, 77, 83, 84, 86, 104 and 105) were not evaluated in the present study.



**Table S6.** Resistance profile of the 31 uropathogenic *E. coli* (UPEC) isolates with multidrug-resistance (MDR) phenotype.

| UPEC<br>identification <sup>a</sup> | Classes of Antimicrobial Drugs <sup>b,c</sup> :                           |                  |                               |                                       |                |                                  |
|-------------------------------------|---------------------------------------------------------------------------|------------------|-------------------------------|---------------------------------------|----------------|----------------------------------|
|                                     | $\beta$ -Lactam                                                           | Aminoglycoside   | Quinolone/<br>Fluoroquinolone | Folic acid<br>Metabolism<br>inhibitor | Nitrofurantoin | Phosphonic<br>acid<br>derivative |
| 10                                  | AMP (R), CFL (R), CRX (R), CTX (R), CPM (R)                               | -                | NAL (R), NOR (R), CIP (R)     | SUT (R)                               | -              | -                                |
| 15                                  | AMP (R), ASB (R), AMC (I), CFL (I)                                        | -                | NAL (R), NOR (R), CIP (R)     | SUT (R)                               | -              | -                                |
| 18                                  | AMP (R)                                                                   | GEN (R)          | NAL (R), NOR (R), CIP (R)     | SUT (R)                               | -              | -                                |
| 19                                  | AMP (R), CFL (I)                                                          | -                | NAL (R), NOR (R), CIP (R)     | SUT (R)                               | -              | -                                |
| 20                                  | AMP (R), CFL (R), CRX (R), CAZ (R), CTX (R),<br>CPM (R)                   | -                | NAL (R), NOR (R), CIP (R)     | SUT (R)                               | -              | -                                |
| 21                                  | CFL (I)                                                                   | GEN (I), AMI (I) | CIP (I)                       | -                                     | -              | -                                |
| 23                                  | AMP (R), AMC (I), CFL (R), CPM (I)                                        | AMI (I)          | NAL (R), NOR (R), CIP (R)     | -                                     | -              | -                                |
| 26                                  | AMP (R), ASB (R), AMC (I), CFL (R)                                        | -                | CIP (I)                       | SUT (R)                               | -              | -                                |
| 30                                  | AMP (R), CFL (R), CRX (R), CAZ (I), CTX (R),<br>CPM (R)                   | AMI (I)          | NAL (R), NOR (R), CIP (R)     | SUT (R)                               | -              | -                                |
| 37                                  | AMP (R)                                                                   | AMI (I)          | NAL (R), CIP (I)              | SUT (R)                               | -              | -                                |
| 43                                  | AMP (R), AMC (R), CFL (R), CRX (R)                                        | GEN (R)          | NAL (R), NOR (R), CIP (R)     | SUT (R)                               | -              | -                                |
| 48                                  | AMP (R), CFL (I)                                                          | -                | NAL (R), NOR (R), CIP (R)     | SUT (R)                               | -              | -                                |
| 49                                  | AMP (R), ASB (I), AMC (I), CFL (I)                                        | -                | CIP (I)                       | SUT (R)                               | -              | -                                |
| 55                                  | AMP (R), PPT (I), AMC (R), CFL (R), CRX (R),<br>CAZ (R), CTX (R), CPM (R) | -                | NAL (R), NOR (R), CIP (R)     | SUT (R)                               | -              | FOS (R)                          |
| 57                                  | AMP (R), ASB (R), AMC (I), CFL (I)                                        | GEN (R)          | -                             | SUT (R)                               | -              | -                                |
| 60                                  | AMP (R), ASB (I), AMC (R), CFL (R), CRX (R),<br>CAZ (R), CTX (R), CPM (R) | -                | NAL (R), NOR (R), CIP (R)     | SUT (R)                               | -              | -                                |
| 71                                  | CFL (I)                                                                   | AMI (I)          | NAL (I), CIP (R)              | -                                     | -              | -                                |
| 72                                  | CFL (I)                                                                   | -                | NAL (R), CIP (R)              | SUT (R)                               | -              | -                                |

Table S6. Continued

| UPEC<br>identification <sup>a</sup> | Classes of Antimicrobial Drugs <sup>b,c</sup> :                           |                |                               |                                       |                |                                  |
|-------------------------------------|---------------------------------------------------------------------------|----------------|-------------------------------|---------------------------------------|----------------|----------------------------------|
|                                     | $\beta$ -Lactam                                                           | Aminoglycoside | Quinolone/<br>Fluoroquinolone | Folic acid<br>Metabolism<br>inhibitor | Nitrofurantoin | Phosphonic<br>acid<br>derivative |
| 82                                  | AMP (R), ASB (I), AMC (I), CFL (I)                                        | -              | NAL (R), CIP (R)              | SUT (R)                               | -              | -                                |
| 85                                  | AMP (R), ASB (R), AMC (I), CFL (R), CRX (R),<br>CTX (R), CPM (R)          | GEN (I)        | NAL (I), CIP (R)              | SUR (R)                               | -              | -                                |
| 89                                  | AMP (R)                                                                   | -              | NAL (R), NOR (R), CIP (R)     | SUT (R)                               | -              | -                                |
| 90                                  | AMP (R), CFL (I)                                                          | GEN (I)        | NAL (R), NOR (R), CIP (R)     | -                                     | -              | -                                |
| 94                                  | AMP (R), AMC (R), CFL (R), CRX (R), CAZ (R),<br>CTX (R), CPM (R)          | -              | NAL (R), NOR (R), CIP (R)     | SUT (R)                               | -              | -                                |
| 99                                  | CFL (I)                                                                   | GEN (I)        | NAL (R), CIP (I)              | -                                     | -              | -                                |
| 100                                 | AMP (R), CFL (I)                                                          | GEN (I)        | NAL (I)                       | SUT (R)                               | -              | -                                |
| 101                                 | AMP (R)                                                                   | GEN (I)        | NAL (R), NOR (R), CIP (R)     | SUT (R)                               | -              | -                                |
| 109                                 | AMP (R), ASB (I), CFL (R), CRX (R), CTX (R),<br>CPM (R)                   | -              | NAL (R), NOR (R), CIP (R)     | SUT (R)                               | -              | -                                |
| 112                                 | AMP (R), ASB (I), AMC (I), CFL (R), CRX (R),<br>CAZ (R), CTX (R), CPM (R) | GEN (R)        | NAL (R), NOR (R), CIP (R)     | SUT (R)                               | NIT (I)        | -                                |
| 114                                 | AMP (R), ASB (I), AMC (I), CFL (R), CRX (R),<br>CAZ (R), CTX (R), CPM (R) | GEN (R)        | NAL (R), NOR (R), CIP (R)     | SUT (R)                               | -              | -                                |
| 119                                 | AMP (R), CFL (R)                                                          | GEN (I)        | -                             | SUT (R)                               | -              | -                                |
| 120                                 | AMP (R), CFL (R), CRX (R), CTX (R), CPM (I)                               | -              | NAL (R), NOR (R), CIP (R)     | SUT (R)                               | -              | -                                |

<sup>a</sup>ESBL-producing UPEC isolates: 10, 20, 30, 55, 60, 85, 94, 109, 112, 114, and 120.

<sup>b</sup>Classes of antimicrobial drugs:  **$\beta$ -Lactams**: ampicillin (AMP), Piperacillin/Tazobactam (PPT), ampicillin/sulbactam (ASB), amoxicillin/clavulanic acid (AMC). cephalothin (CFL), cefuroxime (CRX), ceftazidime (CAZ), cefotaxime (CTX), cefepime (CPM); **Aminoglycoside**: gentamicin (GEN), amikacin (AMI); **Quinolones**: nalidixic acid (NAL), norfloxacin (NOR), ciprofloxacin (CIP); **Folic acid metabolism inhibitors**: trimethoprim/sulfamethoxazole (SUT); **Nitrofurantoin**: nitrofurantoin (NIT); and **Phosphonic acid derivative**: fosfomycin (FOS).

<sup>c</sup>Letters in parentheses indicate: resistant (R) or intermediate (I).
